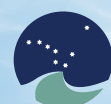

## Contribution to the Symposium: 'International Eel Symposium 2014' Original Article

# Stocking is essential to meet the silver eel escapement target in a river system with currently low natural recruitment

Uwe Brämick\*, Erik Fladung, and Janek Simon

Institute of Inland Fisheries e.V. Potsdam-Sacrow, Im Königswald 2, 14469 Potsdam, Germany

\*Corresponding author: tel: +49 33201 40630; fax: +49 33201 40640; e-mail: [uwe.braemick@ifb-potsdam.de](mailto:uwe.braemick@ifb-potsdam.de)

Brämick, U., Fladung, E., and Simon, J. Stocking is essential to meet the silver eel escapement target in a river system with currently low natural recruitment. – ICES Journal of Marine Science, 73: 91–100.

Received 2 December 2014; revised 29 May 2015; accepted 3 June 2015; advance access publication 23 June 2015.

Under the European Eel Regulation EG 1100/2007, Member States exhibiting natural habitats for the European eel (*Anguilla anguilla*) on their territory are obliged to prepare Eel Management Plans (EMP) containing appropriate measures to safeguard the escapement of a river system specific silver eel target biomass. Stocking is one management option to reach this target. We used various methodical approaches to study population parameters in a large lowland river under the application of a multi-annual intense stocking programme. The approaches were used to further enhance modelling of stock dynamics and silver eel escapement, in particular. Parameterizing the German Eel Model III (GEM III) with values and functions obtained for recruitment, growth, and mortality resulted in an annual escapement estimate of roughly 32 000–64 000 silver eels from 2010 to 2012. Escapement estimates based on a mark-recapture study conducted in parallel revealed somewhat lower values (11 000–25 000) for the same years. In view of the small number of natural recruits, such values are only contingent if stocking had a profound effect on silver eel production. Results from modelling annual silver eel escapement values indicate that escapement targets set in the EMP for this tributary cannot be reached without stocking. This constellation is likely to apply to other Eel Management Units with low current natural immigration values as well, and might be considered a key dilemma in eel management in such catchments due to the current confusion whether translocation of recruits yields a net benefit to the panmictic stock of the European eel.

**Keywords:** *Anguilla anguilla*, eel model, Havel river, management, population parameters, recruitment.

## Introduction

For >100 years, the vast most European rivers have experienced morphological modulation, fragmentation, and a degradation of water quality. These pressures have hampered, in particular, their suitability and function for long-distance migrating fish species, and resulted in severe yield depressions of commercial inland fisheries. To compensate for this human-induced impact on fish stocks and fishery, stocking of lakes and rivers with young European eels (*Anguilla anguilla*) was conducted in Germany as early as the 19th century (Deutscher Fischerei-Verein, 1894; Walter, 1910) and was followed by other European countries (Moriarty and McCarthy, 1982; Wickström, 1984; Wickström and Dekker, 2012).

The distinct decline in European eel stocks has raised the attention of anglers, managers, and scientists for more than a decade. In this respect, stocking, which is exclusively aimed at sustaining fishery yields, has increasingly been questioned. Today, stocking

must also support the production and escapement of silver eel (a migratory phase eel with an advanced maturation status), which has increasingly been prioritized due to declining stock abundance indicators (Moriarty and Dekker, 1997; Dekker, 2004; ICES, 2011).

Moreover, in September 2007, the Council of the European Union (EU) adopted a regulation (EU, 2007) establishing measures for the recovery of European eel stocks. This regulation aims to ensure that 40% of the pristine silver eel biomass of each river system can migrate to sea. Pristine silver eel biomass (defined as  $B_0$  in ICES terminology) is similar to the best estimate of escapement biomass in the absence of any human-induced impacts (EU, 2007). Stocking is one of several potential measures (e.g. a reduction of anthropogenic mortalities, an improvement of river passage and habitats, the transportation of silver eels to waters with no escapement obstacles, and combating predators) to fulfil the requirements of the regulation. Indeed, 14 EU Member States have reported on stocking activities in 49 of 81 Eel Management Units

(EMU) with the implementation of an Eel Management Plan (EMP) (ICES, 2013).

However, the benefit of translocation of early life-stage eels from coastal areas with high natural recruitment to inland freshwater habitats with low or no natural recruitment to increase the spawning stock is under discussion. While stocking aiming to achieve higher fishing yields of predominantly yellow eels has been proven successful in fishery practice (reviews in Tesch, 2003; Knösche et al., 2004; Pawson, 2012), studies on the quantitative effects of stocking on silver eel escapement from larger tributaries with intense stocking over longer periods are rather scarce. Available studies mainly address systems with predominantly natural immigration (Feunteun et al., 2000; MacNamara and McCarthy, 2013; McCarthy et al., 2014), smaller tributaries (Bilotta et al., 2010; Prigge et al., 2013b), or different ecoregions (Desprez et al., 2013). Additionally, stocking inland waters requires various interventions into the natural life cycle of young eels: for example, catching, transporting, temporarily farming, and releasing glass eels into different environments. All listed interventions are hypothesized to impose additional stress and have the potential to negatively impact eels' performance and survival (ICES, 2011; Briand et al., 2012; Simon et al., 2013; Simon and Dörner, 2014). Furthermore, it is assumed that translocated eels experience problems in terms of orientation after silvering when leaving the guiding current of rivers (Westin, 2003; Durif et al., 2013; Prigge et al., 2013a). However, the most comprehensive study in this respect did not find any differences in migration behaviour and orientation between formerly translocated and naturally immigrated silver eels beginning their spawning run from inland waters along the Swedish west coast (Westerberg et al., 2014).

Therefore, the rationale of stocking as a precautionary approach is increasingly being questioned. Thus, the joint EIFAAC/ICES Working Group on Eels has concluded that stocking can only be considered a suitable tool for stock recovery if it generates a net benefit to the stock as a whole (ICES, 2012). To study this notion, certain population parameters (e.g. population size, age structure, growth rate, natural and anthropogenic mortality, and age at silvering) from stocks consisting of translocated individuals must be considered. Furthermore, careful selection of an appropriate study site and design is important. To account for both the high diversity of habitats inhabited by eels and the species' phenotypic plasticity, it is essential to study systems large and diverse enough to mirror this variability, but that are still small and "closed" enough to foster representative sampling. Inspired by the re-launch of a large-scale stocking programme in 2006 in a large lowland river catchment, we applied and combined various methodical approaches to determine parameters imperative for modelling silver eel escapement (e.g. stocking and natural recruitment numbers, sex ratio, growth, age at silvering, and mortality induced by fishery, cormorants, and hydropower turbines). Further, we challenged the results with a mark-recapture study. From modelling results, we aimed to examine the contribution of stocking in a lowland river with intense fishing to reach silver eel escapement targets.

## Material and methods

### Study area

The Havel River provides a lowland tributary to the Elbe River system, which is the second largest river in Germany, and drains into the North Sea (Figure 1). Our study area covered >80% of the Havel drainage system and is composed of 56 300 ha of a unique combination of riverine stretches and lakes. The area not

included in our study consists of a number of lakes in the uppermost stretch of the Havel River. Due to the presence of a weir impassable to upstream migrating eel and a stationary eel trap filtering water discharge at this location, the impact of the excluded area on the eel stock dynamic in the study area was anticipated to be negligible. The mean discharge of the Havel River amounts to  $103 \text{ m}^3 \text{ s}^{-1}$  at its confluence with the Elbe River and is associated with a slow current velocity of  $0.1 \text{ m s}^{-1}$ . The main Elbe channel from the North Sea estuary to the Havel River's confluence (distance of 300 km) holds just one weir, which is equipped with Europe's largest fish ladder ([http://corporate.vattenfall.de/uber-uns/geschäftsfelder/erzeugung/neubauprojekte/Moorburg/Europas\\_groesste\\_Fischtreppe/](http://corporate.vattenfall.de/uber-uns/geschäftsfelder/erzeugung/neubauprojekte/Moorburg/Europas_groesste_Fischtreppe/)). In contrast, there are >250 weirs in the Havel River and its tributaries. Upstream migrating fish, such as young eel, face the first weir with a fish ladder just 560 m after having entered the Havel River system.

### Natural recruitment

For quantitative monitoring of the natural immigration into the Havel River system, a stainless steel trap ( $1.8 \times 1.5 \times 4.3 \text{ m}$ ) with a mesh size of 4 mm was placed in a fish ladder at the first weir encountered by ascending eel. The trap was operated from May to October from 2005 to 2009. The frame of the trap was mounted on the ceiling of the uppermost Denil-pass chamber and calked to avoid the bypassing of ascending eel. Number and total body length ( $L_T$ ) of trapped eel were recorded every 2–3 days.

For the subsequent modelling of the stock, however, only eels  $\leq 400 \text{ mm } L_T$  were considered natural immigrants entering the system upstream at this point. The very small proportion of larger eels was constituted as resident yellow phase eels. Such eels may display restricted movements for foraging, as indicated by studies on the American eel (*Anguilla rostrata*, Lesueur) (Gunning and Shoop, 1962) and analyses of otolith Sr:Ca ratios of *A. anguilla* (Daverat et al., 2006; Shiao et al., 2006). Therefore, we hypothesized that eels in this phase move up and downstream with the same probability, and excluded those from the modelling.

### Stocking

Records of stocking events in the Havel River date back to the early 20th century (Lübbert, 1910). In the present study, quantity and mean length of stocked eels were derived from official statistics beginning in 1985, and were crosschecked with samples taken at stocking events regularly from 2006 to 2012.

### Growth

Estimation of age and growth of eels inhabiting the study area was conducted using methods employed by Simon (2015) in a study of eels from the Elbe River's main channel. One hundred and thirty-four silver eels (76 females and 58 males), grouped by 100 mm size classes (length range: 348–975 mm), were sampled at random from a commercial fykenet fishery also used for silver eel mark-recapture studies (Figure 1) throughout the fishing period (July 2010–November 2011). Individual  $L_T$  and associated wet weight were recorded before storing eels at  $-20^\circ\text{C}$ . After thawing, all eels were visually sexed (Frost, 1945). Sagittal otoliths were extracted and stored in 96% ethanol until preparation for age reading by burning and cracking. Age estimation was based on counts of annuli as described by Simon (2007b) and ICES (2009b).

### Natural mortality

Natural mortality of yellow eels in the Havel River tributary had been estimated in a previous mark-recapture study conducted in five

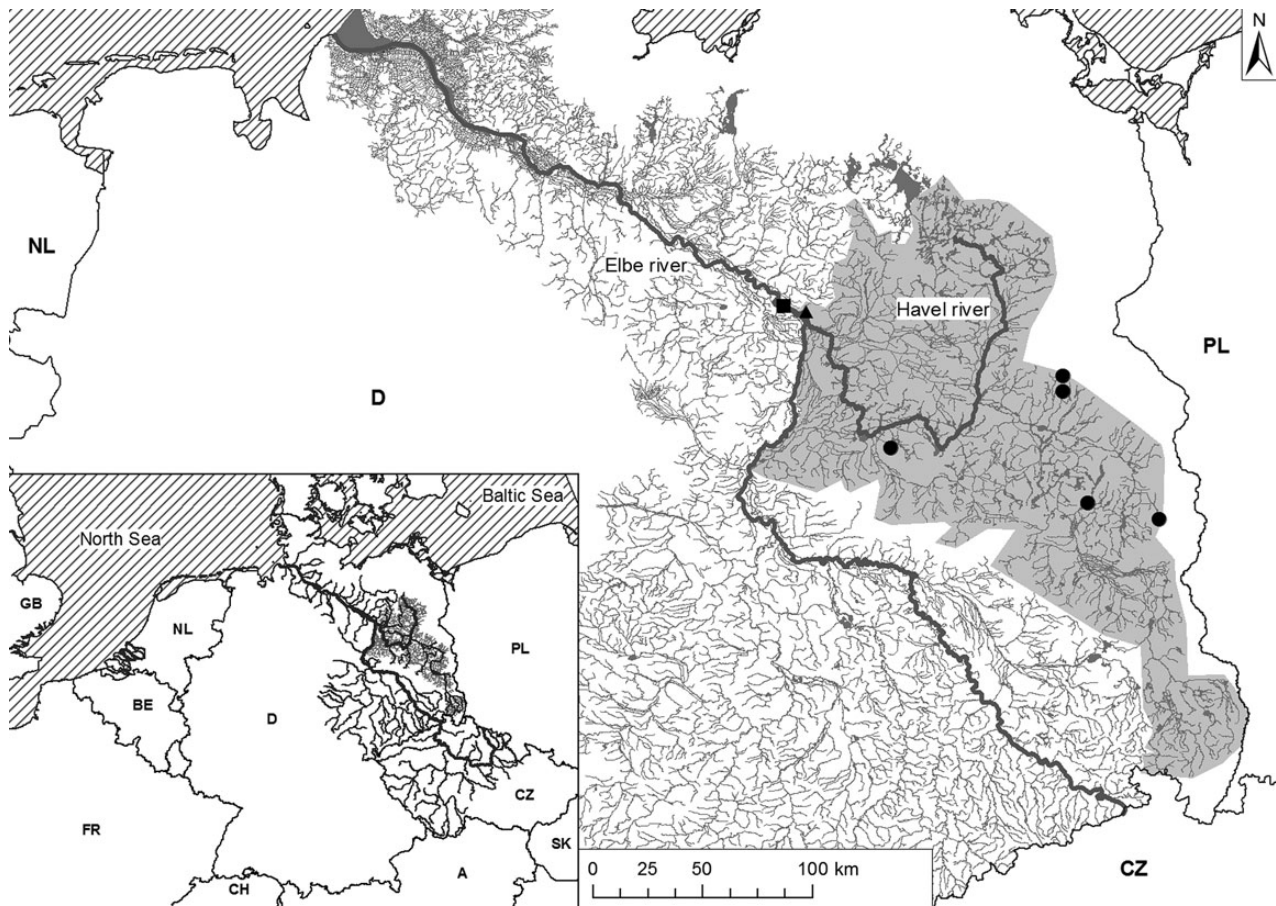

**Figure 1.** Map of the Elbe River including Havel tributary, the study area (shaded in grey), recruitment monitoring station (filled square), silver eel escapement monitoring station (filled triangle), and isolated lakes stocked to study growth and natural mortality (filled circle).

isolated lakes (Simon *et al.*, 2013; Simon and Dörner, 2014). Since neither extraordinary natural (e.g. cormorant predation: no roosting places exist around study lakes as opposed to the Havel River's main channel) nor human-induced mortality affected eel stocks in these lakes, estimates mirror survival under natural conditions. For modelling survivorship in the present study, however, the results obtained in the previous investigation were impaired by restricted coverage of age classes. Therefore, we applied mortality functions based on data from >30 European waters published by Bevacqua *et al.* (2011). To choose the function most appropriate for the specific conditions in the Havel River tributary, we aligned the mortality estimates obtained from the five lakes (Simon and Dörner, 2014) with Bevacqua's mortality functions for different eel densities. The best fit was gained when using the function for low-density stocks (Figure 2).

### Fishery mortality

At the time of the study, 89 commercial fishing companies were operating in the study area. The majority fished for eel using fykes, while some also used electrofishing. Companies are obliged to submit species-specific catch statistics to their local fishery authorities yearly. These statistics, from 1985 to 2012, were made accessible for this study. To verify the size and age frequency of catches, samples totalling 1592 eels were taken from catches of four companies situated in different parts of the Havel River system at 15 dates in 2010.

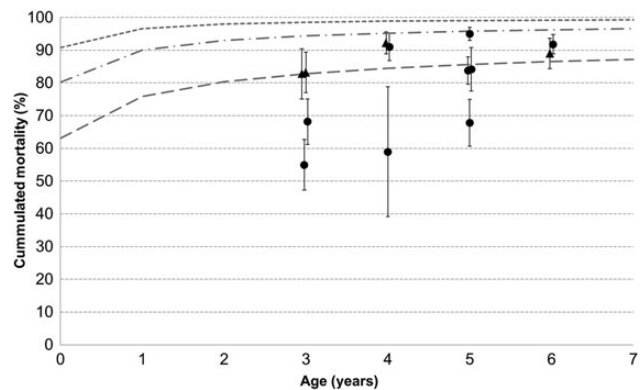

**Figure 2.** Comparison of estimates of cumulated mortality of stocked eels (filled circle, glass eels and filled triangle, farm eels) in lakes based on a mark-recapture experiment in 2010 (Simon and Dörner, 2014) and calculated cumulated mortality percentage (graphs) from Bevacqua *et al.* (2011) for the Havel tributary. The comparison is based on mean growth rate of female eels, a mean water temperature of 11.7°C and on dot dot dot—low, dash dot dash—mean, and dash dash dash—high eel stock densities. Horizontal point offset within same years was inserted for better visual discrimination.

From roughly 90 000 recreational fishery license holders living in the Havel River catchment, 1044 had been randomly chosen to receive logbooks for documentation of eel catches, including



individual length, between January and December 2010. The return rate of the logbooks reached 48% at the end of the recording period.

Instantaneous annual fishery mortality rates were estimated according to [Beverton and Holt \(1957\)](#). In contrast, anthropogenic lifetime mortality ( $\sum A$ ) was estimated from the ratio of the current silver eel escapement ( $B_{\text{current}}$  in ICES terminology) and  $B_{\text{best}}$  + stocking as described in [ICES, 2012](#).

### Additional mortality factors

Besides natural mortality and fishery, eels are exposed to various other local or temporal factors that may cause additional mortalities during their phase of life in the Havel River system. To aid a realistic modelling of stock dynamics, two of such mortality factors of supposedly higher relevance were included in subsequent modelling. Losses due to predation by cormorants near breeding colonies were roughly estimated based on bird counts, average time spent in the study area, daily feed consumption, and the results of a study aimed at quantifying the average proportion of eels in the cormorant forage ([Brämick and Fladung, 2006](#)). The latter was linked to the eel stock size in a way that eel proportion values decreased with declining eel stock size. Cumulative mortality experienced by silver eels passing hydropower stations and major cooling water pumping stations when migrating downstream was roughly estimated based on modelled numbers of silver eels starting their migration upstream. For these eels, overall mortality rates of 30 and 0.5% at each hydropower station and pumping station, respectively, were assumed ([Rauck, 1980](#); [ICES, 2003](#)). In the presence of protective installations (e.g. racks), mortality rates were reduced for water power stations to 7–26%.

### German eel model

For modelling of silver eel escapement, an advanced version (version III) of the German Eel Model (GEM) was applied. As a step forward relating to version II of the GEM ([Oeberst and Fladung, 2012](#)), cohort development was calculated separately for both sexes. Therefore, sex-specific differences in, e.g. growth, mortality, and age at silversing, could be accounted for. For the calculation of silver eel escapement for a defined set of years (in our study, 2006–2016), GEM was parameterized for a period starting in 1985. Resident time in the Havel River system was set at 20 years for both sexes in the model. This value was chosen in light of results obtained from length distributions and age estimations of silver eels on their downstream migration (maximum values of 16 years for males and 19 years for females were observed in this study, while [Simon \(2015\)](#) documented 23 years for males and 19 years for females). For parameters with data not covering these periods, such as growth or natural mortality, in all but one case, we performed this parametrization by expanding observed values to the entire modelling period (Table 1). To estimate natural recruitment before our monitoring period (2005–2009), however, we used data from the present study (Table 2) for a backward projection based on the glass eel and small yellow eel recruitment series published in ICES reports ([ICES, 2012](#)).

### Silver eel escapement monitoring

The number of silver eels leaving the Havel River system was estimated by a mark-recapture study conducted 10 km upstream of the confluence of the Havel and Elbe Rivers (Figure 1). At this location, a special fykenet system with wings spanning about half of the total river width, an opening of 3 × 6 m and a codend mesh size of

15 mm was operated by a commercial fishery throughout the study period, except during periods of ice cover. Catch samples were taken randomly from July to January each season from 2009 to 2011 (Table 3). Individual  $L_T$ , weight, eye diameter, and length of the pectoral fin were taken to assess the degree of silversing according to [Durif et al. \(2009\)](#). In total, 330 silver eels assigned to silver eel stages FIII to FV and MII, respectively, were selected for marking fish with orange visible implant elastomer tags (Table 3), as described in [Simon \(2007a\)](#). All marked silver eels were included in our mark-recapture estimates, irrespective of their silversing stage. After full recovery, marked eels were released 2 km upstream 1–6 h after marking. Subsequently, recapture in the same gear was registered. In combination with total eel catch statistics of that gear, a Lincoln-Petersen estimate ([Bailey, 1951, 1952](#)) was performed to quantify silver eel numbers passing this location. For calculation, the following equation was applied ([Krebs, 1999](#)):

$$N = M \left( \frac{C + 1}{R + 1} \right), \quad (1)$$

where  $N$  is the estimated number of downstream migrating silver eels at this location,  $M$  is the number of marked silver eels released upstream,  $C$  is the total number of silver eels captured in this gear within 1 year irrespective of marks, and  $R$  is the number of recaptured marked silver eels.

The sex ratio of migrating silver eels was determined using the length distribution of all captured silver eels over the entire monitoring season. Discrimination between sex-specific length intervals was based on a subsample of 134 silver eels, for which length and sex were determined. From this, all silver eels >465 mm were assigned as females, while smaller individuals were assigned as males.

### Eel handling

All eels sampled were anaesthetized by exposure to sodium hydrogen carbonate-buffered tricaine methanesulphonate (MS-222, 0.012% aqueous solution) before further handling. Eels sacrificed for determination of age and sex were overdosed with MS-222 (0.015% aqueous solution for 10 min). The German legislation concerning the care and use of laboratory animals was followed, and ethical permission for the investigation was given by the Ministry for Rural Development, Environment and Consumer Protection of the German Federal State of Brandenburg.

### Statistics

Statistical analyses were performed using SPSS 9.0 (SPSS Inc., Chicago, IL, USA). The assumptions of normality and homogeneity of variances of the residuals were not met for many analyses. Therefore, to test for significant differences between sexes for mean age and average length increment in  $L_T$ , a Mann–Whitney  $U$  test was applied. The level of significance was set at  $P < 0.05$ .

## Results

### Natural recruitment in relation to stocking

Recorded  $L_T$  of upstream migrating eels at the monitoring location varied from 110 to 640 mm. The vast majority (99.4%) of those eels displayed  $L_T \leq 400$  mm (mean value: 271 mm  $\pm$  4.6 SD) and were considered in our study as natural recruits. Significant catches of recruits started not before the second half of July and continued with decreasing numbers until November (Figure 3).

**Table 1.** Parameter employed to run GEM III in the present study, including information on unit, origin of data, and period

|     | Parameter                                    | Unit       | Origin                                                                                           | Period                     |
|-----|----------------------------------------------|------------|--------------------------------------------------------------------------------------------------|----------------------------|
| 1.1 | Natural recruitment                          | Number     | Monitoring in the present study                                                                  | 2005–2009                  |
| 1.2 | Natural recruitment                          | Number     | Projection based on 1.1 using ICES recruitment dataserie (ICES, 2012)                            | 1985–2004<br>and 2010–2013 |
| 2   | Stocking                                     | Number     | Official statistics evaluated in the present study                                               | 1985–2013                  |
| 3   | Growth                                       | mm         | Length-at-age back-calculation from otoliths in the present study                                | 2011                       |
| 4   | Natural mortality                            | %          | Bevacqua <i>et al.</i> (2011) after adjustment to experimental data from Simon and Dörner (2014) | 1985–2013                  |
| 5.1 | Commercial fishery mortality                 | kg         | Official statistics evaluated in the present study                                               | 1985–2013                  |
| 5.2 | Angling fishery mortality                    | kg         | Logbook survey in the present study                                                              | 2010                       |
| 5.3 | Angling fishery mortality                    | kg         | Projection based on number of licenses issued                                                    | 1985–2009<br>and 2011–2013 |
| 5.4 | Predation by cormorants                      | kg         | Projection based on official bird count statistics and data from Brämick and Fladung (2006)      | 1985–2013                  |
| 5.5 | Mortality at hydropower and pumping stations | %          | Projection based on overall mortality rates from ICES (2003) and Rauck (1980)                    | 1985–2013                  |
| 6   | Length frequency in the catch of fishery     | %          | Monitoring in the present study                                                                  | 2010                       |
| 7.1 | Silver eel escapement                        | Number, kg | Mark-recapture experiment in the present study                                                   | 2009–2011                  |
| 7.2 | Silver eel escapement                        | Number, kg | Projection based on GEM III                                                                      | 1985–2013                  |

The column on period displays the modelling period for which data of the respective origin were applied.

**Table 2.** Monitoring season of natural eel immigration at the most downstream weir in the Havel tributary, number of monitoring days, total number and size (average and range) of documented eels, average catch per day of operation, and number and size (average and range) of stocked eels in the period 2005–2009

|                                          | 2005          | 2006          | 2007          | 2008          | 2009          | Mean          |
|------------------------------------------|---------------|---------------|---------------|---------------|---------------|---------------|
| Natural eel immigration                  |               |               |               |               |               |               |
| Monitoring season                        | 03.05.–04.12. | 16.05.–01.11. | 13.04.–31.10. | 15.05.–06.11. | 05.05.–17.11. |               |
| Monitoring days (number)                 | 152           | 143           | 163           | 156           | 176           | 158           |
| Ascending eels (number)                  | 43 232        | 35 448        | 38 010        | 20 784        | 27 520        | 32 999        |
| Average (range) size (mm)                | 255 (110–400) | 277 (160–400) | 282 (170–400) | 274 (170–390) | 274 (150–400) | 271 (110–400) |
| Average catch per day (number)           | 284           | 248           | 233           | 133           | 156           | 211           |
| Stocking                                 |               |               |               |               |               |               |
| Eels stocked in total (numbers in mill.) | 1.13          | 3.72          | 2.97          | 4.14          | 4.17          | 3.22          |
| Average size (range) glass eels (mm)     |               |               | 64 (51–76)    |               | 66 (54–77)    | 66 (51–77)    |
| Average size (range) farmed eels (mm)    | 185 (80–240)  | 159 (80–250)  | 167 (80–250)  | 150 (80–270)  | 155 (70–250)  | 159 (70–250)  |
| Average size (range) yellow eels (mm)    | 356           | 342           | 345           | 352           | 380           | 358 (310–470) |

**Table 3.** Year, sampling period, number, mean (range) total length ( $L_T$ ), and proportion of silvering stages of marked silver eels (FIII–FV; MII)

| Year | Sampling period         | Number | Mean (range) $L_T$ (mm) | Proportion of silvering stages (%) <sup>a</sup> |           |          |           |
|------|-------------------------|--------|-------------------------|-------------------------------------------------|-----------|----------|-----------|
|      |                         |        |                         | Stage FIII                                      | Stage FIV | Stage FV | Stage MII |
| 2009 | 15–23 September         | 50     | 654 (569–920)           | 58                                              | 8         | 34       | 0         |
|      | 01–14 December          | 30     | 520 (342–834)           | 0                                               | 7         | 37       | 56        |
| 2010 | 14–16 July              | 50     | 666 (432–842)           | 90                                              | 2         | 6        | 2         |
|      | 28 September–05 October | 53     | 644 (365–954)           | 21                                              | 11        | 57       | 11        |
|      | 02–03 November          | 45     | 490 (326–686)           | 24                                              | 0         | 27       | 49        |
| 2011 | 23–27 October           | 102    | 536 (334–890)           | 7                                               | 4         | 49       | 40        |

<sup>a</sup>Eels were grouped based on the degree of silvering following the methodology of Durif *et al.* (2009).

From 2005 to 2009, ~165 000 natural recruits entering the Havel River were registered at the monitoring location (Table 2). Annual numbers declined during the study period from >40 000 to <30 000. This decline was also apparent on a number-per-day basis. The average number of natural immigrants per year was equivalent to values of roughly 0.5–1 young eel per hectare up-stream water surface area.

From 1985 to 1995, there was intense annual stocking of 3 to >12 million glass eels. In the following years, a shift to farm-sourced and yellow eel stocking along with a reduction of annual intensity to 1–2 million individuals was observed. Following the re-launch of an intense stocking programme in 2006, figures have been increasing to an annual average sum of 3.2 million farm-sourced and glass eels (Table 2). This is equivalent to roughly 50–60 individuals per

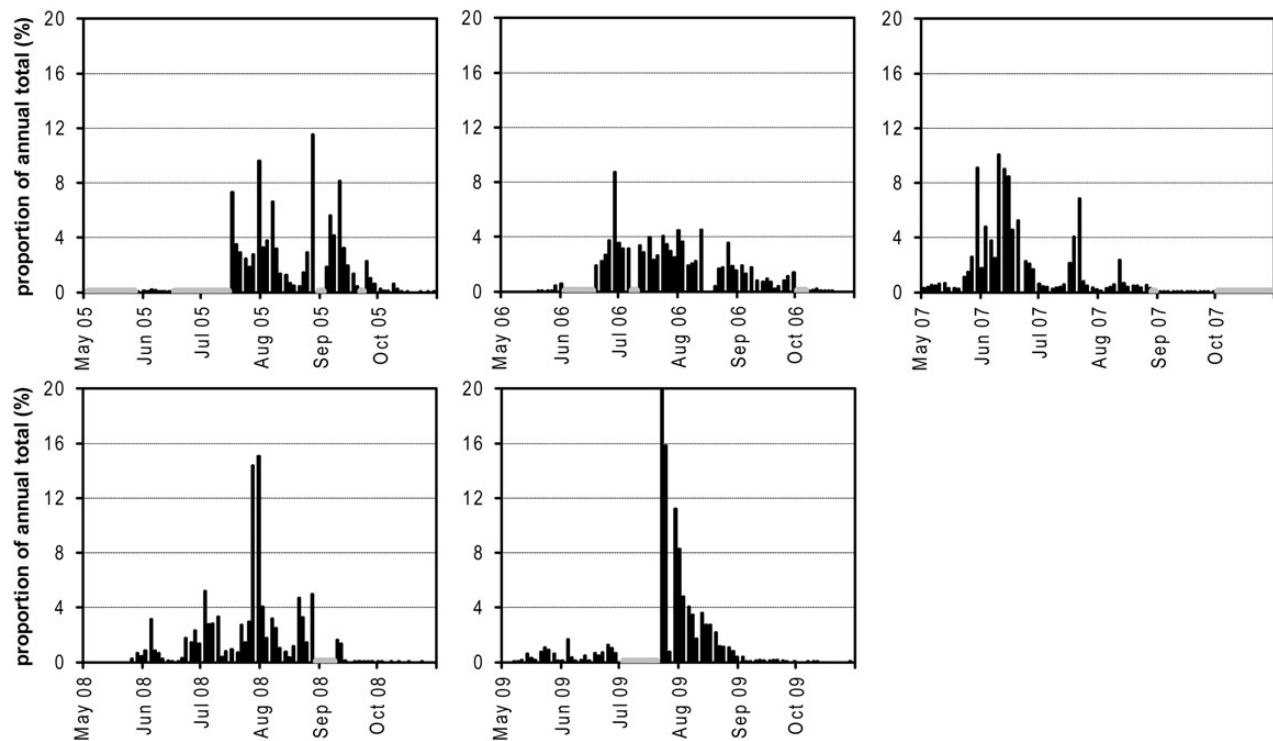

**Figure 3.** Frequency of natural *A. anguilla* recruits documented per day at the most downstream weir of the Havel River (in percentage of annual total) from 2005 to 2009 (from upper left to right). Grey horizontal lines on the x-axis indicate periods without monitoring due to flooding.

hectare. Compared with natural recruitment, stocking accounted for 96–98% of the respective total annual recruitment from 2005 to 2009. When comparing these numbers, it has to be kept in mind that natural recruits entering the Havel River each year were older and larger than restocked counterparts of the same year (Table 2), and were likely to reach silvering age and size earlier.

### Growth pattern

The variable  $L_T$  of silver eels in our samples ranged from 348 to 485 mm for males ( $n = 58$ ) and from 387 to 975 mm for females ( $n = 76$ ). Age readings revealed estimates from 8 to 16 years for males and 7 to 19 years for females. Across all size classes at capture, mean age, and annual length increments were significantly higher for females with 13 years and 54 mm year<sup>-1</sup> when compared with males with 12 years and 37 mm year<sup>-1</sup> ( $U$  test,  $d.f. 1$ ,  $P < 0.01$  for age and  $P < 0.001$  for annual length increment; Table 4). The current growth of eels in the Havel River system is reflected by *von Bertalanffy* values of  $L_\infty = 1110$  mm,  $k = 0.0641$ , and  $t_0 = -1.149$  for females and  $L_\infty = 473$  mm,  $k = 0.143$ , and  $t_0 = -0.931$  for males.

### Anthropogenic mortality

Data in logbooks received from anglers showed that, in 2010, only 12% had caught eels in the study area. The average catch per successful eel angler reached 2289 g (range 216–12 713 g). From this, annual total eel catch by anglers was estimated as 0.5 kg ha<sup>-1</sup> (31 t). In comparison, commercial fishery yielded 2.0 kg ha<sup>-1</sup> (115 t) in the same year. Considering the length-frequencies of catches as well as growth rates (Table 4), instantaneous annual fishery mortality reached a value of  $F = 0.035$ . To facilitate an

**Table 4.** Sample size ( $n$ ) and mean ( $\pm$  SD) total length ( $L_T$ , mm) at age of continental life back calculated from otoliths of female and male silver eels from the Havel River system

| Age | Female |               | Male |              |
|-----|--------|---------------|------|--------------|
|     | $n$    | $L_T$         | $n$  | $L_T$        |
| 0   | 76     | 75 $\pm$ 8    | 58   | 63 $\pm$ 6   |
| 1   | 76     | 146 $\pm$ 18  | 58   | 116 $\pm$ 14 |
| 2   | 76     | 207 $\pm$ 27  | 58   | 160 $\pm$ 21 |
| 3   | 76     | 262 $\pm$ 35  | 58   | 198 $\pm$ 29 |
| 4   | 76     | 312 $\pm$ 43  | 58   | 232 $\pm$ 34 |
| 5   | 76     | 360 $\pm$ 50  | 58   | 264 $\pm$ 39 |
| 6   | 76     | 406 $\pm$ 57  | 58   | 295 $\pm$ 43 |
| 7   | 76     | 451 $\pm$ 62  | 58   | 324 $\pm$ 46 |
| 8   | 75     | 493 $\pm$ 67  | 58   | 350 $\pm$ 48 |
| 9   | 73     | 532 $\pm$ 74  | 56   | 371 $\pm$ 47 |
| 10  | 69     | 570 $\pm$ 80  | 50   | 383 $\pm$ 42 |
| 11  | 65     | 601 $\pm$ 86  | 40   | 388 $\pm$ 39 |
| 12  | 49     | 628 $\pm$ 93  | 27   | 391 $\pm$ 33 |
| 13  | 33     | 663 $\pm$ 97  | 18   | 390 $\pm$ 26 |
| 14  | 29     | 684 $\pm$ 98  | 7    | 401 $\pm$ 31 |
| 15  | 17     | 712 $\pm$ 108 | 5    | 397 $\pm$ 21 |
| 16  | 11     | 745 $\pm$ 114 | 2    | 382 $\pm$ 13 |
| 17  | 8      | 771 $\pm$ 102 | 0    |              |
| 18  | 6      | 813 $\pm$ 89  | 0    |              |
| 19  | 1      | 770           | 0    |              |

Age 0 = glass eel size.

evaluation of the effects of stocking on the total European eel stock, lifetime anthropogenic mortality rates ( $\sum A$ ) are decisive. Based on the data of our study in the year 2010, this rate was estimated to reach a value of 2.03 in the Havel River.

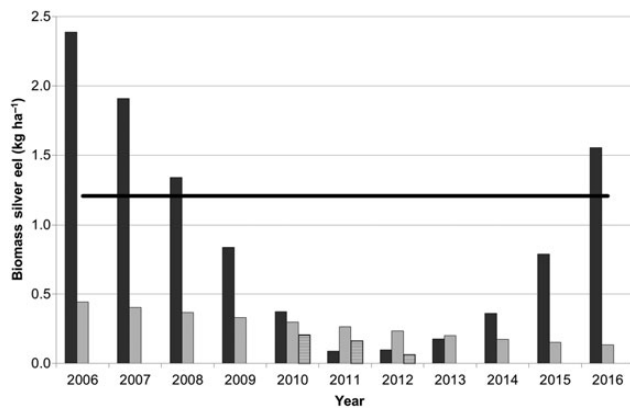

**Figure 4.** Modelled biomass values of the silver eel ( $\text{kg ha}^{-1}$ ) leaving the Havel tributary at present (black columns,  $B_{current}$ ), and without anthropogenic caused mortalities and stocking (grey columns,  $B_{best}$ ) in relation to a silver eel escapement target defined in the European eel regulation (black horizontal line) for 2006–2016. Striped columns indicate a silver eel escapement biomass estimate from mark-recapture studies from 2010 to 2012.

## Silver eel escapement estimates

### Modelling approach

Estimates based on the GEM III showed a high variation in the biomass of silver eels annually leaving the study area (Figure 4). While minimum values of  $0.09\text{--}0.17 \text{ kg ha}^{-1}$  (equivalent to 4900–9800 kg and 32 000–55 000 individuals) were modelled for the period 2011–2013, values exceeding the escapement target ( $1.2 \text{ kg ha}^{-1}$ ) were obtained for the period before 2008 and for 2016. At the same time,  $B_{best}$  (defined as silver eel escapement corresponding to recent natural recruitment if there were only natural mortality and no stocking) is calculated to reach decreasing values of  $0.4\text{--}0.1 \text{ kg ha}^{-1}$  (35 000–16 000 individuals) between 2011 and 2016.

### Mark-recapture approach

Of 330 silver eels marked (Table 3), 17 were recaptured within 1-year post release. Combined with catch statistics of the fykenet, estimates of successfully emigrating silver eels reached values of 25 360 (95% confidence interval = 28 652), 19 950 (15 904), and 10 757 (5608) individuals for 2010–2012, respectively. These numbers correspond to annual biomass estimates of  $14\,591 \text{ kg}$  (95% confidence interval = 16 485),  $9811 \text{ kg}$  (7821), and  $5186 \text{ kg}$  (2704), respectively.

## Discussion

The results of our study quantify the effect of stocking on silver eel escapement for a large lowland freshwater tributary. According to model estimates, 32 000–64 000 silver eels left the Havel River on their spawning run from 2010 to 2012 (Figure 4). This value will increase to roughly 260 000 silver eels by 2016 due to the effects of the re-launched stocking programme. To evaluate the importance of stocking for silver eel escapement from the Havel River system, a comparison with  $B_{best}$  is reasonable. This parameter currently reaches roughly 30 000 individuals, but values will decrease until 2016 to 16 000 individuals due to the decreasing natural recruitment during past years. This means that if recruitment would entirely be based on natural immigration, and these recruits only experienced natural mortality, the estimated number of silver eels would remain distinctively lower when compared with current and future escapement

estimates. Therefore, we conclude that, compared with  $B_{best}$ , stocking can become a suitable tool to increase silver eel escapement even in EMU with intense eel fishery and other human-induced mortalities.

It cannot be excluded though that the quantity of naturally immigrating recruits was underestimated in our study. Monitoring of natural immigrants had to be stopped for 19–63 days each season (equivalent to 10–30% of the respective monitoring season) within the study period due to occasional trap malfunctions caused by flooding. Within these monitoring gaps, an unknown quantity of migrants entered the Havel River system. Furthermore, a number of individuals might have entered the Havel River system outside the monitoring period. Nevertheless, at these times, water temperatures were  $<8^{\circ}\text{C}$ , which is known to inhibit eel movement considerably (Vøllestad *et al.*, 1986; Tesch, 2003). In addition, as no study on the catch rate of upstream migrants was conducted, it cannot be excluded that some individuals might have bypassed the trap by climbing up the lateral walls of the uppermost chamber of the ladder or the weir shutter itself. Due to the very closely fitted ceiling of the trap, and the water level difference at the weir during monitoring periods of  $>1 \text{ m}$ , these eel numbers should have been low. In fact, such bypassers were never observed during daily routine controls. In conclusion, the supposed quantity of eels that may have entered the Havel River system unrecorded would not significantly change either the absolute quantity of natural immigrants and associated  $B_{best}$  estimates, or their minor proportion compared with the number of young eels stocked into the system.

As demonstrated by our study, the Havel River is hosting an eel assemblage almost exclusively composed of stocked individuals. Although stocked eels could not be distinguished from natural migrants on an individual basis in our study, population parameters currently recorded for eels in this system can be considered exemplary for stocked eels in a productive natural eel habitat.

There are a number of indications that high eel stock densities may impact demographic population parameters, such as growth, survival, or sex ratios (ICES, 2009a). This may negatively affect (female) silver eel production. For example, data by Rosell (ICES, 2008) demonstrated density-dependent mortality in Lough Neagh for glass eel stocking of  $>200$  equivalents/ha. Acou *et al.* (2011) interpreted male dominated populations as an indication for stock densities reaching carrying capacity in a small coastal catchment in France. In our study, we did not observe such signs when annual stocking and natural recruitment summed to  $>50$  individuals  $\text{ha}^{-1}$  on average (maximum up to 95 individuals) in the Havel River. The proportion of males in the silver eel monitoring was 24%, and growth estimates based on length-at-age back-calculation using otoliths of silver eels were well within the range observed in neighbouring lowland rivers (Simon *et al.*, 2011; Reckordt *et al.*, 2014) and in isolated lakes (Simon and Dörner, 2014; Figure 5). In parallel, if absolute numbers in natural recruitment observed in our study (10 000–40 000 individuals per year) were used for a backward projection based on glass and small yellow eel recruitment series (ICES, 2012), natural recruitment in the Havel River system from 1960 to 1979 is estimated in a magnitude order of  $20\text{--}70$  individuals  $\text{ha}^{-1}$ . This is not exceeded by the average sum of today's stocking intensity and natural recruitment. Therefore, our results should be largely unbiased by effects associated with threshold values of stock density.

Silver eel escapement values derived from our mark-recapture study were about half as high as those estimated using GEM III. Differences may be attributed to variations causal factors triggering silver eel escapement, as well as general uncertainties associated with



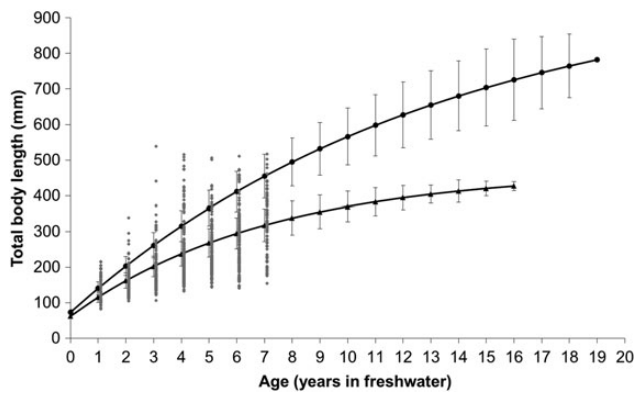

**Figure 5.** Comparison of mean ( $\pm$  SD) total length ( $L_T$ , mm) at age of continental life back calculated from otoliths of (filled triangle) male and (filled circle) female silver eels in the Havel River, and measured for (grey filled circle) stocked eels of known age in isolated lakes (Simon and Dörner, 2014).

the determination of catch efficiencies by mark-recapture studies (Robson and Regier, 1964; Heimbuch *et al.*, 1990; Krebs, 1999). In addition, the mark-recapture study conducted is likely to partially underestimate the number of males in particular. This is due to their small body size at silvering and the fykenet displaying mesh sizes between 15 mm in the codend and up to 35 mm on the wings. As opposed to larger growing females, male silver eels escaping from waters in northern Europe are known to not exceed 46 cm  $L_T$  (Tesch, 2003). Likewise, the number of males up to 450 mm  $L_T$  in our modelled annual silver eel escapement values amounts to roughly 28 000 individuals (99% of all silver males). From our own studies (unpublished data), it is known that eels of this size are capable of passing screens with a mesh size of 16 mm. Therefore, we conclude that the results of both approaches, despite the differences, are in the same order of magnitude and support (not question) each other. Therefore, GEM III can be considered giving plausible silver eel escapement estimates when parameterized with tributary-specific data. This is in line with the result of an application of the previous version (GEM II) in a smaller Baltic river catchment (Prigge *et al.*, 2013b). Nevertheless, a number of parameters used for modelling were estimates based on relatively small sample sizes or obtained by extrapolation. Therefore, they display a lower level of confidence than hard data, which impacted the accuracy of our model estimates.

As mentioned before, stocking of young eels in the Havel River has resulted in increased silver eel escapement. In conclusion, stocking displayed an additive effect in a self-recruiting eel stock. For self-recruiting stocks of other species, this is not necessarily the case. As an example, Hühn *et al.* (2014) demonstrated the lack of additive effects in a stock enhancement study on northern pike (*Esox lucius*). The authors concluded that stocking in self-recruiting populations might fail to elevate stock size due to competition of stocked fish with natural recruits. Natural eel recruitment in the Havel River could be demonstrated in our study as well. In contrast to species spawning within a colonized water body, eel recruitment success in inland waters is not driven by internal factors. In such situations, stocking has the potential to add to self-recruiting stocks.

According to our modelling results, silver eel escapement recently declined from 0.5 to  $<0.2$  kg ha $^{-1}$ , but will recover in coming years due to the time-lag until restocked eel have matured and become migrant. The target escapement given in the European eel regulation is likely to be reached within the next few years.

Challenging this perspective with modelled  $B_{best}$  values makes the key dilemma of eel management in the Havel River very clear. Without stocking, the target of the eel regulation will not be met due to low natural immigration numbers, even if all anthropogenic mortality factors could be stopped completely. On the other hand, uncertainties regarding stocking and its net effects on this panmictic species at the species level have been raised (ICES, 2012). Our results are not sufficient to demonstrate whether such a net benefit for the European eel stock as a whole has been achieved under the Havel River stocking programme. However, they provide an estimate of mortality experienced by stocked eel in a freshwater tributary until spawning migration. In a next step, mortality rates during glass eel fisheries for stocking material, transport, and silver eel downstream migration to sea need to be quantified. These accomplishments will allow for a comparison with total mortality rates experienced by natural recruits left untouched in areas where glass eel fishing for stocking material is commenced.

## Acknowledgements

We thank E. Dittmann, R. Frenzel, N. Hannemann, J. Kolew, J. Pufelski, F. Weichler, and P. Wolf for technical assistance and support, and R. Wolf for providing Figure 1. The fishers S. Ahlendorf and E. Wegener are gratefully acknowledged for providing silver eels and operation of the elver trap. We also thank R. Oeberst from the Thünen-Institute of Baltic Sea Fishery, Rostock for advice during the enhancement of the German Eel Model II, and M. Pietrock for helpful comments on the manuscript and assistance with the proper use of English. Financial support was provided by the FIAF/EFF-programme of the EU, the Federal State of Brandenburg (grant number Az16-1222-09/22) and the German Federal Ministry of Food, Agriculture and Consumer Protection (BMELV) through the Federal Office for Agriculture and Food (BLE), grant number 2807HS036.

## References

- Acou, A., Rivot, E., Van Gils, J. A., Legault, A., Ysnel, F., and Feunteun, E. 2011. Habitat carrying capacity is reached for the European eel in a small coastal catchment: evidence and implications for managing eel stocks. *Freshwater Biology*, 56: 952–968.
- Bailey, N. T. J. 1951. On estimating the size of mobile populations from recapture data. *Biometrika*, 38: 293–306.
- Bailey, N. T. J. 1952. Improvements in the interpretation of recapture data. *Journal of Animal Ecology*, 21: 120–127.
- Bevacqua, D., Melia, P., De Leo, G. A., and Gatto, M. 2011. Intra-specific scaling of natural mortality in fish: the paradigmatic case of the European eel. *Oecologia*, 165: 333–339.
- Beverton, R. J. H., and Holt, J. J. 1957. On the dynamics of exploited fish populations. *Fish and Fisheries Series* 11. Chapman and Hall, London. 533 pp.
- Bilotta, G. S., Sibley, P., Hateley, J., and Don, A. 2010. The decline of the European eel *Anguilla anguilla*: quantifying and managing escapement to support conservation. *Journal of Fish Biology*, 78: 23–38.
- Brämick, U., and Fladung, E. 2006. Quantifizierung der Auswirkungen des Kormorans auf die Seen und Flussfischerei Brandenburgs am Beispiel des Aals. *Fischerei & Naturschutz*, 8: 85–92.
- Briand, C., Sauvaget, B., Girard, P., Fatin, D., and Beaulaton, L. 2012. Push net fishing seems to be responsible for injuries and post fishing mortality in glass eel in the Vilaine estuary (France) in 2007. *Knowledge and Management of Aquatic Ecosystems*, 404: Article no. 02, 13 pp.
- Daverat, F., Limburg, K. E., Thibault, I., Shiao, J. C., Dodson, J. J., Caron, F., Tzeng, W. N., *et al.* 2006. Phenotypic plasticity of habitat use by three temperate eel species, *Anguilla anguilla*, *A. japonica* and *A. rostrata*. *Marine Ecology Progress Series*, 308: 231–241.



- Dekker, W. 2004. Slipping through our hands. Population dynamics of the European eel. PhD thesis, University of Amsterdam, The Netherlands. 186 pp.
- Desprez, M., Crivelli, A. J., Lebel, I., Massez, G., and Gimenez, O. 2013. Demographic assessment of a stocking experiment in European eels. *Ecology of Freshwater Fish*, 22: 412–420.
- Deutscher Fischerei-Verein. 1894. Die Aussetzungen von Eiern, Brut und Edelfischen durch den Deutschen Fischerei-Verein in den Jahren 1892/93 und 1893/94. *Zeitschrift für Fischerei und deren Hilfswissenschaften*, 2: 185–209.
- Durif, C., Guibert, A., and Elie, P. 2009. Morphological discrimination of the silvering stages of the European eel. *American Fisheries Society*, 58: 103–111.
- Durif, C. M. F., Browman, H. I., Phillips, J. B., Skiftesvik, A. B., Vøllestad, L. A., and Stockhausen, H. H. 2013. Magnetic compass orientation in the European eel. *PLoS ONE* 8: e59212.
- EU. 2007. Council Regulation (EC) No 1100/2007 of 18 September 2007 establishing measures for the recovery of the stock of European eel. *Official Journal of the European Union*, L 248: 17–23.
- Feunteun, E., Acou, A., Lafaille, P., and Legault, A. 2000. European eel (*Anguilla anguilla*): prediction of spawner escapement from continental population parameters. *Canadian Journal of Fisheries and Aquatic Sciences*, 57: 1627–1635.
- Frost, W. E. 1945. The age and growth of eels (*Anguilla anguilla*) from the Windermere catchment area Part I and II. *Journal of Animal Ecology*, 14: 26–36 and 106–124.
- Gunning, G., and Shoop, C. R. 1962. Restricted movements of the American eel *Anguilla rostrata* (LeSueur) in freshwater streams with comments in the growth rate. *Tulane Studies in Zoology*, 9: 265–272.
- Heimbuch, D. G., Dunning, D. J., Wilson, H., and Ross, Q. E. 1990. Sample-size determination for mark-recapture-experiments: Hudson River Case Study. *American Fisheries Society Symposium*, 7: 684–690.
- Hühn, D., Lübke, K., Skov, C., and Arlinghaus, R. 2014. Natural recruitment, density-dependent juvenile survival, and the potential for additive effects of stock enhancement: an experimental evaluation of stocking northern pike (*Esox lucius*) fry. *Canadian Journal of Fisheries and Aquatic Science*, 71: 1508–1519.
- ICES. 2003. Report of the EIFAC/ICES Working Group on Eels, 2-6 September 2002, Nantes, France. ICES CM 2003/ACFM:06.
- ICES. 2008. Report of the 2008 session of the Joint EIFAC/ICES Working Group on Eels. Leuven, Belgium, 3–9 September 2008. EIFAC Occasional Paper. No. 43. ICES CM 2009/ACOM: 15, Rome, FAO/Copenhagen. 192 pp.
- ICES. 2009a. Report of the 2009 Session of the joint EIFAC/ICES Working Group on Eels. Göteborg, 7-12 September 2009. ICES CM 2009/ACOM:15. 117 pp.
- ICES. 2009b. Workshop on Age Reading of European and American Eel (WKAREA), 20-24 April 2009, Bordeaux, France. ICES CM 2009/ACOM: 48. 66 pp.
- ICES. 2011. Report of the 2011 Session of the Joint EIFAAC/ICES Working Group on Eels. Lisbon, Portugal, 5–9 September 2011. 223 pp.
- ICES. 2012. Report of the joined EIFAAC/ICES working group on eels, 3-9 September 2012, Copenhagen, Denmark. ICES CM 2012/ACOM: 18. 201 pp.
- ICES. 2013. Report of the Workshop on Evaluation Progress Eel Management Plans (WKEPEMP), 13–15 May 2013, Copenhagen, Denmark. 757 pp.
- Knösche, R., Schreckenbach, K., Simon, J., Eichhorn, T., Pietrock, M., and Thürmer, C. 2004. Aalwirtschaft in Brandenburg. Entwicklung der Aalbestände, Schadfaktoren und nachhaltige Aalwirtschaft. Schriftenreihe des Institutes für Binnenfischerei e.V., Potsdam-Sacrow, 15: 75 pp.
- Krebs, C. J. 1999. *Ecological Methodology*. Addison-Welsey Longman, Inc., Menlo Park, CA. 620 pp.
- Lübbert, H. 1910. Die Besetzung deutscher Gewässer mit Aalbrut im Jahre 1909. *Zeitschrift für Fischerei und deren Hilfswissenschaften*, 15: 183–233.
- MacNamara, R., and McCarthy, T. K. 2013. Silver eel (*Anguilla anguilla*) population dynamics and production in the River Shannon, Ireland. *Ecology of Freshwater Fish*, 23: 181–192.
- McCarthy, T. K., Nowak, D., Grennan, J., Bateman, A., Conneely, B., and MacNamara, R. 2014. Spawner escapement of European eel (*Anguilla anguilla*) from the River Erne, Ireland. *Ecology of Freshwater Fish*, 23: 21–32.
- Moriarty, C., and Dekker, W. 1997. Management of the European eel. *Fisheries Bulletin Dublin*, 15: 167 pp.
- Moriarty, C., and McCarthy, D. 1982. Eel. Report of the Symposium on Stock Enhancement in the Management of Freshwater Fisheries, pp. 3–6. The European Inland Fisheries Advisory Commission. EIFAC Technical Paper, Budapest, Hungary. 57 pp.
- Oeberst, R., and Fladung, E. 2012. German Eel Model (GEM II) for describing eel, *Anguilla anguilla* (L.), stock dynamics in the river Elbe system. *Information on Fishery Research*, 59: 9–17.
- Pawson, M. 2012. Does translocation and restocking confer any benefit to the European eel population? A review. 54 pp.; [http://www.sustainableeelgroup.com/seg\\_docs/does-restocking-work-a-review-by-mike-pawson/#.VTD0gpPLLv8](http://www.sustainableeelgroup.com/seg_docs/does-restocking-work-a-review-by-mike-pawson/#.VTD0gpPLLv8) (last accessed 3 January 2015).
- Prigge, E., Marohn, L., and Hanel, R. 2013a. Tracking the migratory success of stocked European eels *Anguilla anguilla* in the Baltic Sea. *Journal of Fish Biology*, 82: 686–691.
- Prigge, E., Marohn, L., Oeberst, R., and Hanel, R. 2013b. Model prediction vs. reality-testing the predictions of a European eel (*Anguilla anguilla*) stock dynamics model against the in situ observation of silver eel escapement in compliance with the European eel regulation. *ICES Journal of Marine Science*, 70: 309–318.
- Rauk, G. 1980. Mengen und Arten vernichteter Fische und Krebstiere an den Rechen des Einlaufbauwerkes im Kernkraftwerk Brunsbüttel, sowie Testversuche zur Reaktion von Fischen auf die Elektroscheuchanlage auf der Basis von dort anfallenden Fischproben. Bundesforschungsanstalt für Fischerei, Veröffentlichungen des Instituts für Küsten und Binnenfischerei Hamburg, 71/1980, 22 pp.
- Reckordt, M., Ubl, C., Wagner, C., Frankowski, J., and Dorow, M. 2014. Downstream migration dynamics of female and male silver eels (*Anguilla anguilla* L.) in the regulated German lowland Warnow River. *Ecology of Freshwater Fish*, 23: 7–20.
- Robson, D. S., and Regier, H. A. 1964. Sample size in Petersen mark-recapture experiments. *Transactions of the American Fisheries Society*, 93: 215–226.
- Shiao, J. C., Ložys, L., Iizuka, Y., and Tzeng, W. N. 2006. Migratory patterns and contribution of stocking to the population of European eel in Lithuanian waters as indicated by otolith Sr:Ca ratios. *Journal of Fish Biology*, 69: 749–769.
- Simon, J. 2007a. Evaluation of marking European silver eels with visible implant elastomer tags and alcian blue. *Journal of Fish Biology*, 70: 303–309.
- Simon, J. 2007b. Age, growth, and condition of European eel (*Anguilla anguilla*) from six lakes in the River Havel system (Germany). *ICES Journal of Marine Science*, 64: 1414–1422.
- Simon, J. 2015. Age and growth of European eels (*Anguilla anguilla*) in the Elbe River system in Germany. *Fisheries Research*, 164: 278–285.
- Simon, J., and Dörner, H. 2014. Survival and growth of European eels stocked as glass and farm sourced eels in five lakes in the first years after stocking. *Ecology of Freshwater Fish*, 23: 40–48.
- Simon, J., Dorow, M., and Ubl, C. 2011. Wachstum von Aalen (*Anguilla anguilla*) in den Binnen- und Küstengewässern Mecklenburg-Vorpommerns. *Fischer & Teichwirt*, 62: 449–451.
- Simon, J., Dörner, H., Scott, R. D., Schreckenbach, K., and Knösche, R. 2013. Comparison of growth and condition of European eels stocked as glass and farm sourced eels in lakes in the first 4 years after stocking. *Journal of Applied Ichthyology*, 29: 323–330.

- Tesch, F.-W. 2003. The Eel, 3rd edn. Blackwell Science Ltd, Oxford.
- Vøllestad, L. A., Jonsson, B., Hvidsten, N. A., Naesje, T. F., Haraldstad, O., and Ruud-Hansen, J. 1986. Environmental factors regulating the seaward migration of European silver eels (*Anguilla anguilla*). Canadian Journal of Fisheries and Aquatic Sciences, 43: 1909–1916.
- Walter, E. 1910. Der Flußaal, eine biologische und fischwirtschaftliche Monographie. Verlag J. Neumann, Neudamm, Germany.
- Westerberg, H., Sjöberg, N., Lagenfelt, I., Aarestrup, K., and Righton, D. 2014. Behaviour of stocked and naturally recruited European eels during migration. Marine Ecology Progress Series, 496: 145–157.
- Westin, L. 2003. Migration failure in stocked eels *Anguilla anguilla*. Marine Ecology Progress Series, 254: 307–311.
- Wickström, H. 1984. The Swedish eel stocking programme. EIFAC Technical Paper, 42(Suppl. 1): 68–83.
- Wickström, H., and Dekker, W. 2012. Restocking eel: an appraisal of effects on fish, stock and fishery. World Fisheries Conference. Swedish University of Agricultural Sciences, Poster, Edinburgh.

Handling editor: Caroline Durif
